# Supplementary material for: Laboratory studies of fresh and aged biomass burning aerosol emitted from east African biomass fuels – Part 1: Optical properties
Source: Copernicus journal article supplement (doi:10.5194/acp-20-10149-2020), 2020-09-02
Supplement: Supplementary file 1 [file acp-20-10149-2020-supplement.zip]

Archive with 3 entries (3 files):
- supplement.pdf
- acp-20-10149-2020-supplement-title-page.pdf
- Data_for_All_figures copy.xlsx
