# Supplementary material for: Laboratory studies of fresh and aged biomass burning aerosol emitted from east African biomass fuels – Part 1: Optical properties
Source: Copernicus journal article supplement (doi:10.5194/acp-20-10149-2020), 2020-09-02
Supplement: Supplementary file 1 [file acp-20-10149-2020-supplement.zip › acp-20-10149-2020-supplement-title-page.pdf]

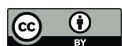

*Supplement of*

**Laboratory studies of fresh and aged biomass burning aerosol emitted from east African biomass fuels – Part 1: Optical properties**

**Damon M. Smith et al.**

*Correspondence to:* Solomon Bililign (bililignsol@gmail.com)

- [acp-20-10149-2020-supplement-title-page.pdf](#)
- [Data\\_for\\_All\\_figures copy.xlsx](#)
- [supplement.pdf](#)

The copyright of individual parts of the supplement might differ from the CC BY 4.0 License.
