# Supplementary material for: Laboratory studies of fresh and aged biomass burning aerosol emitted from east African biomass fuels – Part 1: Optical properties
Source: Copernicus journal article supplement (doi:10.5194/acp-20-10149-2020), 2020-09-02
Supplement: Supplementary file 1 [file Data_for_All_figures copy.xlsx]

## Sheet: Figure_1
Aged_500_dark	GMD_500_dark	Aged_500_light	GMD_500_light	Aged_500_voc	GMD_500_voc	Aged_800_dark	GMD_800_dark	Aged_800_light	GMD_800_light	Aged_800_voc	GMD_800_voc
0	48.8523	0	45.2603	-5.55112e-17	73.2649	5.55112e-17	32.8592	0	37.0653	-5.55112e-17	31.9066
0.0833333	68.5543	0.0830556	64.7438	0.0836111	71.0299	0.0833333	35.696	0.0833333	37.1736	0.0833333	36.1423
0.166944	80.736	0.166389	88.0605	0.166667	94.4791	0.166667	40.9084	0.166944	42.6957	0.166667	39.9076
0.25	89.4706	0.249722	102.281	0.25	107.738	0.25	45.3463	0.25	48.3511	0.25	43.1622
0.333333	96.488	0.333056	113.043	0.333611	117.13	0.333333	49.5432	0.333333	53.5422	0.333333	46.2619
0.416667	102.455	0.416389	122.003	0.416667	129.253	0.416667	53.333	0.416944	57.9134	0.416667	47.3317
0.500278	107.356	0.499722	129.916	0.5	140.49	0.5	56.6165	0.5	62.1515	0.5	51.7644
0.583333	112.086	0.583056	137.168	0.583611	147.848	0.583333	60.0102	0.583333	65.6512	0.583333	52.1708
0.666667	116.42	0.666389	143.574	0.666667	156.048	0.666944	63.1245	0.666667	68.8939	0.666667	56.365
0.750278	120.154	0.749722	149.458	0.75	162.762	0.750278	65.6678	0.75	71.9065	0.75	56.4953
0.833333	123.284	0.833056	155.003	0.833333	168.61	0.833611	68.4717	0.833333	74.5295	0.833333	58.455
0.916667	126.199	0.916389	159.685	0.916667	174.006	0.916944	71.0137	0.916667	77.0833	0.916667	60.3919
1.00028	128.14	0.999722	165.251	1.00028	179.103	1	73.7604	1	79.314	1	62.0591
1.08333	131.299	1.08306	169.757	1.08333	183.633	1.08333	75.6734	1.08333	81.7704	1.08333	65.9938
1.16667	133.719	1.16639	173.583	1.16667	186.977	1.16667	78.3843	1.16667	83.8737	1.16667	67.4215
1.25028	136.186	1.24972	177.538	1.25	191.513	1.25	80.5695	1.25	86.0707	1.25	69.1857
1.33333	138.344	1.33306	180.855	1.33333	195.75	1.33333	82.8209	1.33333	88.1202	1.33333	70.6255
1.41667	140.641	1.41639	184.964	1.41694	199.142	1.41694	85.1598	1.41667	89.9865	1.41667	72.1934
22.9117	281.428	1.49972	188.931	1.5	203.565	1.50028	87.0866	1.5	91.7565	1.5	73.5468
23.9119	278.051	1.58306	191.552	1.58333	206.929	1.58361	89.2354	1.58333	93.7712	1.58333	74.9187
24.9117	279.279	1.66639	199.206	1.66667	209.167	5.70611	161.276	1.66667	95.1345	1.66667	76.1087
25.9117	280.509	1.79028	215.513	1.75	211.974	6.20611	163.469	1.75	97.0183	1.75	77.4164
26.9119	279.225	1.87361	219.774	1.83361	214.572	6.70639	169.273	1.83333	98.224	1.83333	78.5797
27.9117	283.998	1.95694	223.118	1.91667	218.26	7.20639	173.773	1.91667	99.742	1.91667	79.7507
28.9117	283.886	2.04028	226.314	2	219.694	7.70639	178.549	2	101.332	2	81.1005
29.9119	282.006	2.12361	229.759	2.08361	222.062	8.20611	181.968	2.08333	102.966	2.08333	82.3903
30.9117	286.621	2.20694	231.716	2.16667	224.943	8.70611	186.603	2.16667	103.934	2.16667	83.6168
31.9117	287.545	2.29028	235.724	2.25	227.547	9.20611	190.489	2.25	106.003	2.25	84.6575
32.9117	287.284	2.37361	238.187	2.33361	229.744	9.70611	196.453	2.33333	104.067	2.33333	85.9918
33.9117	288.403	2.45694	241.009	2.41667	231.011	10.2061	198.386	2.41667	108.516	2.41667	87.0068
34.9117	288.799	2.54028	243.831	2.5	233.388	10.7061	202.134	2.5	109.844	2.5	88.0828
35.9117	287.91	2.62361	245.935	2.58333	234.925	11.2061	206.536	2.58333	111.287	2.58333	88.8644
36.9117	289.901	2.70694	248.77	2.66667	236.468	11.7064	209.107	2.66667	112.637	2.66667	89.9937
37.9119	291.62	2.79028	248.673	2.75028	238.441	12.2061	211.056	2.75	113.698	2.75	90.7698
38.9119	291.117	2.87361	251.168	2.83333	240.603			2.83333	111.552	2.83333	91.8563
39.9117	291.653	2.95694	254.048	2.91667	240.593			2.91667	115.976	2.91667	92.9239
40.9117	293.203	3.04028	256.826	3	243.409			3	114.133	3	93.6666
41.9117	294.48	3.12361	257.211	3.08333	244.117			3.08333	118.651	3.08333	94.6299
42.9117	293.32	3.20694	260.035	3.16694	247.611			3.16667	119.699	3.16667	95.6812
43.9117	293.986	3.29028	264.97	3.25	249.648			3.25	121.096	3.25	96.2103
44.9119	292.148	3.37361	267.515	3.33333	249.924			3.33333	122.21	3.33333	97.2984
45.9117	292.52	3.45694	268.079	3.41667	251.622			3.41667	122.897	3.41694	98.0759
46.9342	293.624	3.54028	269.751	3.5	252.748			3.5	124.419	3.5	99.2653
47.1078	292.023	3.62361	270.621	3.58361	255.617			3.58333	125.929	3.58333	99.802
47.2739	298.576	3.70694	272.817	3.66667	255.554			3.66667	126.63	3.66667	100.598
51.3606	295.542	3.79028	273.957	3.75	258.264			3.75	127.429	3.75	101.643
51.5281	299.081	3.87361	276.711	3.83361	259.017			3.83333	128.188	3.83361	102.256
51.6056	298.437	3.95694	276.57	3.91667	260.784			3.91667	129.415	3.91667	103.413
		4.04028	277.674	4	261.316			4	130.489	4	103.834
		4.12361	279.373	4.08333	265.126			4.08333	131.487	4.08333	105.007
		4.20694	282.418	4.16667	264.446			4.16667	132.817	4.16667	105.453
		4.29028	282.728	4.25028	265.898			4.25	133.389	4.25028	106.128
		4.37361	284.128	4.33333	267.835			4.33333	134.084	4.33333	106.672
		4.45694	285.433	4.41667	268.812			4.41667	135.026	4.41667	107.674
		4.54028	286.068	4.5	269.686			4.5	135.992	4.5	108.004
		4.62361	288.71	4.58333	271.059			4.58333	137.114	4.58333	109.213
		4.70694	289.885	4.66667	272.112			4.66667	137.753	4.66667	109.934
		4.79028	289.192	4.75	272.708			4.75	138.804	4.75028	110.171
		4.87361	292.444	4.83361	274.726			4.83333	139.551	4.83333	110.605
		4.95694	291.006	4.91667	274.583			4.91667	140.292	4.91667	111.214
		5.04028	293.454	5	276.683			5	141.452	5	111.864
		5.12361	294.281	5.08361	278.199			5.08333	142.375	5.08333	113.195
		5.20694	295.628	5.16667	280.971			5.16667	143.207	5.16694	113.661
		5.29028	295.88	5.25	280.704			5.25	143.948	5.25	114.21
		5.45694	299.133	5.33333	281.481			5.33333	145.376	5.33333	114.797
		5.79028	305.047	5.41667	284.291			5.41694	145.789	5.41667	115.27
		6.12361	308.372	5.5	284.134			5.5	143.142	5.5	115.959
		6.45694	310.876	5.58333	285.842			5.58333	147.63	5.58361	116.665
		6.79028	312.885	5.66694	284.446			5.66694	147.993	5.66667	117.628
		7.12361	316.642	5.75	286.591			5.75	148.77	5.75	118.416
		7.45694	321.561	5.83333	287.96			5.83333	149.925	5.83333	118.807
		7.79028	322.913	5.91667	287.121			5.91694	150.107	5.91667	119.426
		8.12361	325.567	6	288.289			6	151.29	6	119.122
		8.45694	327.729	6.08361	291.043			6.08333	151.086	6.08361	119.984
		8.79056	330.014	6.16667	293.275			6.16667	153.086	6.16667	121.057
		9.12361	331.548	6.25	295.478			6.25	153.358	6.25	120.972
		9.45694	335.246	6.33333	295.12			6.33333	154.231	6.33361	121.745
		9.79056	339.538	6.41667	295.843			6.41694	154.673	6.41667	121.874
		10.1239	337.992	6.50028	297.839			6.5	155.513	6.5	123.066
		10.4569	341.949	6.58333	295.829			6.58333	156.743	6.58333	123.795
		10.7906	342.084	6.66667	297.488			6.66694	157.245	6.66667	124.008
		11.1239	343.483	6.75	298.06			6.75	153.442	6.75028	121.094
		11.2322	362.191	6.83333	299.383			6.83333	158.618	6.83333	125.245
		11.3222	360.966	6.91694	299.985			6.91694	160.155	6.91667	126.082
				7	301.078			7	159.728	7	125.901
				7.08361	302.435			7.08333	159.383	7.08333	126.978
				7.16667	304.25			7.16667	161.045	7.16694	123.582
				7.25	304.795			7.25	161.404	7.25	128.267
				7.33361	305.843			7.33361	161.961	7.33361	128.48
				7.41667	303.573			7.41667	163.251	7.41667	125.816
				7.50028	307.175			7.5	163.557	7.5	130.128
				7.58333	309.159			7.58361	164.097	7.58361	129.952
				7.66667	309.403			7.66667	165.199	7.66667	130.515
				7.75028	313.553			7.75	165.462	7.75028	130.599
				7.83333	314.136			7.83361	166.645	7.83333	131.147
				7.91694	315.409			7.91667	166.511	7.91667	132.175
				8	314.333			8	168.008	8.00028	132.276
				8.08333	314.813			8.08361	168.516	8.08333	132.754
				8.16667	317.196			8.16667	164.324	8.16667	133.761
				8.25	315.16			8.25	169.054	8.25028	130.003
				8.33333	314.885			8.33361	169.543	8.33333	131.204
				8.41667	315.163			8.41667	171.198	8.41667	131.48
				8.50028	317.171			8.5	171.665	8.5	131.763
				8.58333	314.212			8.58361	171.292	8.58333	132.315
				8.66667	321.376			8.66667	173.029	8.66694	132.444
				8.75028	320.477			8.75	172.611	8.75	133.202
				8.83333	317.728			8.83361	174.08	8.83361	133.335
				8.91694	318.661			8.91667	174.325	8.91667	134.319
				9	316.992			9	174.559	9	133.976
				9.08361	316.316			9.08333	175.123	9.08361	134.983
				9.16667	317.969			9.16667	175.592	9.16667	134.92
				9.25	321.746			9.25028	176.008	9.25	136.245
				9.33361	321.234			9.33333	177.008	9.33361	133.987
				9.41667	322.478			9.41667	177.956	9.41694	134.194
				9.5	323.026			9.5	178.455	9.5	136.215
				9.58361	327.177			9.58333	179.103	9.58333	136.878
				9.66667	325.846			9.66694	179.855	9.66694	138.504
				9.75	324.912			9.75	179.931	9.75	141.391
				9.83333	329.397			9.83333	180.744	9.83333	139.017
				9.91667	328.779			9.91694	181.047	9.91667	139.919
				10.0003	327.783			10	181.056	10	140.328
				10.0833	329.202			10.0833	181.976	10.0833	140.692
				10.1667	327.29			10.1667	182.094	10.1667	141.318
				10.25	332.501			10.25	183.012	10.2503	140.948
				10.3333	328.61			10.3336	183.096	10.3333	142.174
				10.4169	328.138			10.4167	182.981	10.4167	142.359
				10.5	330.119			10.5	183.777	10.5003	142.419
				10.5833	329.429			10.5836	184.473	10.5833	143.444
				10.6669	331.774			10.6667	185.342	10.6667	143.638
				10.75	332.736			10.75	185.457	10.75	144.155
				10.8336	333.46			10.8333	186.242	10.8333	144.262
				10.9167	333.979			10.9167	181.759	10.9169	143.624
				11	334.48			11.0003	186.477	11	145.6
				11.0836	336.9			11.0833	187.911	11.0833	144.811
				11.1667	341.049			11.1667	188.561	11.1667	149.375
				11.2503	333.691			11.2503	188.722	11.25	146.734
				11.3333	337.434			11.3333	190.041	11.3333	146.012
				11.4167	331.385			11.4167	188.772	11.4167	148.292
				11.5003	334.377			11.5	189.366	11.5	147.216
				11.5833	335.259			11.5833	189.941	11.5836	148.556
				11.6667	333.04			11.6669	191.476	11.6667	149.126
				11.7503	332.697			11.75	191.235	11.75	149.29
				11.8333	339.282			11.8333	192.338	11.8336	149.256
				11.9167	336.949			11.9169	186.857	11.9167	149.677
				12.0003	339.57			12	187.106	12	150.414
								12.0833	192.376	12.0836	154.608
								12.1669	192.644	12.1667	151.286
								12.25	193.605	12.1667

## Sheet: Figure_3
Diameter	SSA_Mie	Diameter	SSA_Mie	Dp	Euca_BC	Euca_BrC	Acacia_BrC	Acacia_BC	Olive_BC	Olive_BrC
200	0.574166	200	0.389359	200	0.468	0.645	0.727	0.325	0.283	0.675
220	0.604733	220	0.413909	300	0.439	0.66	0.769	0.309	0.287	0.728
240	0.625393	240	0.430919	400	0.427	0.668	0.857	0.308	0.29	0.816
260	0.641806	260	0.440811
280	0.659401	280	0.445409
300	0.679688	300	0.448045
320	0.699442	320	0.451503
340	0.714196	340	0.456346
360	0.721654	360	0.461321
380	0.72265	380	0.464904
400	0.720692	400	0.466492
420	0.720276	420	0.466676
440	0.723519	440	0.466695
460	0.728331	460	0.467567
480	0.730935	480	0.469514
500	0.729071	500	0.47207

## Sheet: Figure_4
Wavelength	Acac_300_BC_fresh	'Acac_300_BC_fresh_+err'	'Acac_300_BC_fresh_-err'	Acac_300_BrC_fresh	'Acac_300_BrC_fresh_+err'	'Acac_300_BrC_fresh_-err'	Euca_300_BC_fresh	'Euca_300_BC_fresh_+err'	'Euca_300_BC_fresh_-err'	Euca_300_BrC_fresh	'Euca_300_BrC_fresh_+err'	'Euca_300_BrC_fresh_-err'	Oliv_300_BC_fresh	'Oliv_300_BC_fresh_+err'	'Oliv_300_BC_fresh_-err'	Oliv_300_BrC_fresh	'Oliv_300_BrC_fresh_+err'	'Oliv_300_BrC_fresh_-err'
580	0.339801	0.355301	0.3243	0.986005	1.00367	0.968335	0.421187	0.434094	0.408279	0.623005	0.655627	0.590383	0.373381	0.397449	0.349314	0.992119	1.01537	0.968868
578	0.349055	0.37137	0.32674	0.891983	0.915356	0.868611	0.451767	0.464704	0.43883	0.621908	0.643021	0.600796	0.314999	0.387288	0.24271	0.898521	0.918571	0.878471
576	0.300035	0.316707	0.283363	0.864642	0.910769	0.818514	0.441578	0.461379	0.421777	0.641709	0.682951	0.600467	0.325577	0.391561	0.259593	0.852878	0.914861	0.790896
574	0.306917	0.320078	0.293756	0.833271	0.891471	0.775072	0.439563	0.456013	0.423113	0.648045	0.708892	0.587199	0.300048	0.348068	0.252028	0.822897	0.920967	0.724827
572	0.286196	0.299476	0.272916	0.814402	0.872742	0.756062	0.438377	0.45238	0.424374	0.666745	0.704993	0.628496	0.291951	0.32098	0.262922	0.797148	0.879177	0.715119
570	0.303657	0.324699	0.282614	0.802527	0.841312	0.763741	0.450303	0.459432	0.441175	0.66819	0.694624	0.641755	0.311552	0.329836	0.293267	0.761103	0.817329	0.704877
568	0.307105	0.316318	0.297892	0.792117	0.812035	0.772199	0.425969	0.435689	0.416249	0.667533	0.685374	0.649691	0.308524	0.325988	0.29106	0.749178	0.797392	0.700965
566	0.324321	0.33971	0.308932	0.780705	0.805816	0.755594	0.456807	0.466136	0.447478	0.663376	0.681971	0.644782	0.316712	0.343858	0.289565	0.736424	0.783854	0.688993
564	0.32043	0.332913	0.307947	0.775528	0.795392	0.755664	0.43901	0.447461	0.43056	0.662128	0.679928	0.644328	0.259851	0.273275	0.246428	0.743361	0.786253	0.700468
562	0.315597	0.327884	0.303309	0.7689	0.787694	0.750107	0.441344	0.449967	0.43272	0.645683	0.660149	0.631217	0.285124	0.298681	0.271568	0.738949	0.777896	0.700002
560	0.299713	0.31098	0.288446	0.779248	0.798785	0.759711	0.426595	0.436759	0.416431	0.655664	0.669236	0.642091	0.287386	0.303117	0.271655	0.733129	0.773536	0.692723
558	0.302891	0.313208	0.292575	0.777582	0.79967	0.755494	0.43016	0.438166	0.422154	0.661771	0.676313	0.647229	0.288517	0.298735	0.278298	0.730732	0.792637	0.668826
556	0.303803	0.315108	0.292498	0.769462	0.79194	0.746983	0.418606	0.426487	0.410724	0.672985	0.73194	0.61403	0.272496	0.278694	0.266298	0.730155	0.76664	0.693669
554	0.289496	0.29958	0.279412	0.767624	0.794385	0.740863	0.447687	0.456229	0.439146	0.657945	0.678585	0.637305	0.293781	0.30475	0.282811	0.726502	0.770605	0.682398
552	0.295878	0.304606	0.287149	0.774073	0.792419	0.755728	0.439592	0.44947	0.429713	0.644056	0.65843	0.629682	0.30567	0.323394	0.287946	0.724361	0.764993	0.683728
550	0.294104	0.303662	0.284546	0.771435	0.793541	0.749329	0.439901	0.448681	0.431121	0.652066	0.669257	0.634874	0.29516	0.305716	0.284604	0.714282	0.75159	0.676973
548	0.293457	0.302573	0.284341	0.771008	0.79616	0.745856	0.422919	0.431614	0.414224	0.645293	0.661202	0.629384	0.302357	0.314311	0.290403	0.715835	0.759065	0.672605
546	0.29264	0.305623	0.279657	0.76922	0.790198	0.748242	0.452082	0.461607	0.442557	0.647203	0.661336	0.633071	0.273212	0.285794	0.26063	0.713541	0.755485	0.671597
544	0.289944	0.299656	0.280233	0.767121	0.798604	0.735639	0.440633	0.449285	0.431982	0.651176	0.671147	0.631205	0.286363	0.29922	0.273505	0.717599	0.78406	0.651139
542	0.301314	0.315199	0.287429	0.771521	0.792717	0.750324	0.447049	0.456209	0.437889	0.648931	0.664994	0.632868	0.319812	0.333555	0.306068	0.713598	0.754471	0.672724
540	0.296277	0.306867	0.285686	0.769331	0.795548	0.743115	0.434491	0.444601	0.424381	0.675774	0.692628	0.658919	0.291157	0.307149	0.275164	0.7098	0.758952	0.660647
538	0.30964	0.320163	0.299116	0.756481	0.792694	0.720267	0.42446	0.434649	0.414272	0.659862	0.676129	0.643594	0.315372	0.328346	0.302398	0.712284	0.747889	0.676679
536	0.297109	0.310093	0.284124	0.752967	0.787893	0.718041	0.428461	0.437753	0.419168	0.659852	0.677329	0.642375	0.303391	0.312458	0.294323	0.711102	0.783564	0.63864
534	0.291834	0.303013	0.280654	0.766435	0.798055	0.734814	0.416007	0.423807	0.408207	0.647165	0.665699	0.628632	0.297501	0.309597	0.285404	0.707934	0.765365	0.650504
532	0.309306	0.3248	0.293812	0.760576	0.797591	0.723561	0.44848	0.45757	0.439389	0.659967	0.676917	0.643018	0.286189	0.299083	0.273294	0.714635	0.82389	0.605379
530	0.317783	0.330784	0.304781	0.757204	0.789508	0.724899	0.435755	0.444246	0.427264	0.658946	0.675103	0.642789	0.302133	0.316443	0.287824	0.708113	0.774137	0.64209
528	0.317327	0.331304	0.30335	0.76582	0.804523	0.727117	0.453257	0.463484	0.44303	0.655329	0.672761	0.637897	0.286001	0.30126	0.270743	0.712354	0.760846	0.663862
526	0.327754	0.33874	0.316769	0.750073	0.777862	0.722284	0.425592	0.435064	0.416119	0.649308	0.66848	0.630137	0.302076	0.316849	0.287302	0.712454	0.803361	0.621547
524	0.304679	0.318366	0.290991	0.746982	0.766534	0.72743	0.429201	0.438828	0.419575	0.660898	0.679488	0.642307	0.300106	0.313074	0.287138	0.718447	0.799812	0.637083
522	0.30067	0.31381	0.287529	0.756749	0.787442	0.726056	0.444243	0.452671	0.435816	0.654521	0.675785	0.633257	0.298476	0.311143	0.285809	0.719572	0.796734	0.642411
520	0.295571	0.30743	0.283713	0.75584	0.789665	0.722016	0.443558	0.453935	0.433181	0.669086	0.685792	0.652381	0.310415	0.327254	0.293577	0.725477	0.773648	0.677307
518	0.322872	0.332338	0.313407	0.755622	0.774937	0.736307	0.430759	0.438881	0.422638	0.642893	0.657039	0.628748	0.308171	0.318792	0.29755	0.726683	0.785007	0.668359
516	0.32521	0.336279	0.314142	0.761755	0.795779	0.727731	0.450856	0.46016	0.441552	0.65344	0.668363	0.638518	0.32755	0.343681	0.311419	0.731691	0.773807	0.689575
514	0.309549	0.321199	0.2979	0.762521	0.786639	0.738404	0.43923	0.448667	0.429792	0.672594	0.68648	0.658708	0.307647	0.321346	0.293949	0.734721	0.786965	0.682477
512	0.317609	0.328951	0.306268	0.764239	0.789741	0.738737	0.434188	0.444285	0.424092	0.668521	0.68268	0.654363	0.307417	0.319047	0.295788	0.737863	0.790438	0.685287
510	0.315134	0.327744	0.302524	0.772715	0.799124	0.746305	0.431714	0.440069	0.42336	0.659055	0.673126	0.644984	0.317622	0.330172	0.305071	0.739295	0.771771	0.706818
508	0.314904	0.323497	0.306311	0.767725	0.796058	0.739392	0.428748	0.437218	0.420278	0.666155	0.682161	0.65015	0.291313	0.30371	0.278917	0.741009	0.793915	0.688103
506	0.334047	0.34737	0.320725	0.775283	0.799579	0.750988	0.442187	0.454043	0.430331	0.674308	0.689713	0.658904	0.319193	0.337687	0.3007	0.745767	0.78083	0.710704
504	0.330486	0.348426	0.312546	0.774182	0.796264	0.752099	0.457431	0.468816	0.446046	0.669259	0.685921	0.652598	0.314265	0.341461	0.28707	0.748514	0.785655	0.711373
502	0.323846	0.339704	0.307989	0.777554	0.804388	0.750721	0.464164	0.479167	0.449162	0.677073	0.690537	0.663609	0.289859	0.313509	0.266209	0.750281	0.789042	0.711519
500	0.330169	0.34422	0.316118	0.793061	0.826384	0.759739	0.46645	0.480918	0.451981	0.671101	0.691135	0.651068	0.294205	0.310452	0.277957	0.761124	0.805454	0.716794

## Sheet: Figure_5
MCE_liu_etal	SSA_liu_etal	MCE_pokhrel_etal	SSA_pokhrel_etal	MCE_Thisstudy	SSA_thisstudy
0.95	0.95	0.93	0.8	0.89	0.67
0.96	0.91	0.918	0.95	0.98	0.42
0.98	0.51	0.913	0.78	0.89	0.85
0.98	0.41	0.943	0.86	0.96	0.3
0.91	0.88	0.683	1	0.87	0.8
0.99	0.79	0.946	0.91	0.99	0.31
0.98	0.3	0.848	0.99
0.98	0.3	0.97	0.78
0.97	0.37	0.978	0.55
0.99	0.3	0.925	0.87
0.98	0.48	0.941	0.91
0.98	0.87	0.97	0.92
0.82	0.98	0.972	0.62
0.99	0.41	0.933	0.85
0.91	0.95	0.965	0.76
0.98	0.77	0.811	1
0.98	0.37	0.692	0.98
0.89	0.96	0.744	1
0.93	0.96	0.798	0.99
0.92	0.92	0.872	0.98
0.97	0.88	0.839	0.98
0.96	0.96	0.961	0.84
0.93	0.97	0.957	0.93
0.89	0.9	0.956	0.88
0.89	0.89	0.956	0.85
0.86	0.89	0.957	0.93
0.96	0.72	0.954	0.61
0.97	0.34	0.959	0.56
0.97	0.44	0.962	0.9
0.99	0.59	0.95	0.94
0.96	0.6	0.928	0.94
0.97	0.39	0.969	0.38
0.97	0.45	0.952	0.83
0.98	0.59	0.939	0.95
0.97	0.41	0.927	0.91
0.96	0.47	0.975	0.32
0.96	0.73	0.937	0.94
0.96	0.5	0.934	0.93
0.96	0.87	0.925	0.43
0.95	0.92	0.962	0.83
0.95	0.8	0.803	0.99
0.92	0.78
0.94	0.9
0.94	0.96
0.97	0.35
0.95	0.55
0.94	0.84
0.94	0.88
0.93	0.83
0.94	0.65
0.96	0.59
0.81	1
0.78	0.99
0.74	1
0.87	0.99
0.69	1
0.9	0.98
0.86	0.99
0.92	0.96
0.94	0.93
0.93	0.97
0.95	0.93
0.92	0.75
0.92	0.98
0.85	0.96
0.96	0.92
0.94	0.92
0.95	0.88
0.96	0.67
0.97	0.43
0.96	0.47
0.96	0.45
0.97	0.41
0.97	0.44
0.96	0.4
0.95	0.39
0.95	0.49
0.93	0.98
0.93	0.94
0.98	0.61
0.96	0.46
0.95	0.83
0.95	0.74
0.97	0.94
0.91	0.96
0.97	0.88
0.97	0.75
0.97	0.9
0.97	0.7
0.95	0.58
0.96	0.39
0.97	0.46

## Sheet: Figure_6
Wavelength	Euca_300_BrC_fresh	Euca_300_BrC_dark	Acac_300_BrC_fresh	Acac_300_BrC_dark	Oliv_300_BrC_fresh	Oliv_300_BrC_dark
580	0.623005	0.75315	0.986005	0.90708	0.992119	0.967947
578	0.621908	0.761831	0.891983	0.925074	0.898521	0.880266
576	0.641709	0.662059	0.864642	0.888789	0.852878	0.859312
574	0.648045	0.659623	0.833271	0.855503	0.822897	0.897903
572	0.666745	0.664242	0.814402	0.912911	0.797148	0.913535
570	0.66819	0.696604	0.802527	0.889663	0.761103	0.90292
568	0.667533	0.699008	0.792117	0.904378	0.749178	0.948871
566	0.663376	0.735883	0.780705	0.899486	0.736424	0.868853
564	0.662128	0.704389	0.775528	0.914618	0.743361	0.91605
562	0.645683	0.691748	0.7689	0.854542	0.738949	0.815501
560	0.655664	0.707204	0.779248	0.862052	0.733129	0.896185
558	0.661771	0.70624	0.777582	0.828506	0.730732	0.893485
556	0.672985	0.737621	0.769462	0.815306	0.730155	0.92126
554	0.657945	0.707833	0.767624	0.849548	0.726502	0.863644
552	0.644056	0.701107	0.774073	0.859244	0.724361	0.92848
550	0.652066	0.678602	0.771435	0.922074	0.714282	0.89171
548	0.645293	0.701655	0.771008	0.856966	0.715835	0.849493
546	0.647203	0.709689	0.76922	0.868401	0.713541	0.879016
544	0.651176	0.746237	0.767121	0.873879	0.717599	0.892234
542	0.648931	0.675368	0.771521	0.843281	0.713598	0.859681
540	0.675774	0.686294	0.769331	0.791697	0.7098	0.908298
538	0.659862	0.705596	0.756481	0.820233	0.712284	0.895397
536	0.659852	0.683809	0.752967	0.821044	0.711102	0.837116
534	0.647165	0.727556	0.766435	0.831684	0.707934	0.904565
532	0.659967	0.732688	0.760576	0.872199	0.714635	0.874564
530	0.658946	0.711443	0.757204	0.783811	0.708113	0.842675
528	0.655329	0.672177	0.76582	0.836071	0.712354	0.87846
526	0.649308	0.711099	0.750073	0.811137	0.712454	0.882013
524	0.660898	0.699511	0.746982	0.785885	0.718447	0.861148
522	0.654521	0.70797	0.756749	0.832294	0.719572	0.882577
520	0.669086	0.71041	0.75584	0.878093	0.725477	0.834977
518	0.642893	0.69735	0.755622	0.772291	0.726683	0.84567
516	0.65344	0.712556	0.761755	0.82481	0.731691	0.880114
514	0.672594	0.752152	0.762521	0.838677	0.734721	0.897647
512	0.668521	0.712907	0.764239	0.806685	0.737863	0.873147
510	0.659055	0.712088	0.772715	0.835849	0.739295	0.885186
508	0.666155	0.705129	0.767725	0.833654	0.741009	0.895105
506	0.674308	0.758401	0.775283	0.864377	0.745767	0.932561
504	0.669259	0.688776	0.774182	0.884855	0.748514	0.91616
502	0.677073	0.68191	0.777554	0.877525	0.750281	0.944805
500	0.671101	0.687811	0.793061	0.850293	0.761124	0.897885

## Sheet: Figure_7
Wavelength	Euca_300_BrC_fresh	Euca_300_BrC_light	Acac_300_BrC_fresh	Acac_300_BrC_light	Oliv_300_BrC_fresh	Oliv_300_BrC_light	Euca_300_BrC_VOC	Acac_300_BrC_VOC
580	0.623005	0.874221	0.986005	0.952465	0.992119	0.992777	1.00529	0.958515
578	0.621908	0.920163	0.891983	0.929292	0.898521	1.00539	0.996661	0.912564
576	0.641709	0.913036	0.864642	0.948194	0.852878	0.997963	0.942548	0.918605
574	0.648045	0.934045	0.833271	0.940884	0.822897	1.00153	0.982398	0.94424
572	0.666745	0.966621	0.814402	0.975072	0.797148	1.01142	0.973938	0.906246
570	0.66819	0.952025	0.802527	0.952971	0.761103	1.02875	0.964037	0.914362
568	0.667533	0.917695	0.792117	0.891674	0.749178	0.992416	0.990979	0.902593
566	0.663376	0.940175	0.780705	0.924666	0.736424	1.00328	0.960085	0.894804
564	0.662128	0.956426	0.775528	0.933039	0.743361	1.02272	0.940532	0.901112
562	0.645683	0.964119	0.7689	0.922313	0.738949	0.962145	0.987788	0.90137
560	0.655664	0.933312	0.779248	0.923919	0.733129	0.984297	0.947216	0.88616
558	0.661771	0.917655	0.777582	0.923854	0.730732	0.979412	0.93574	0.91412
556	0.672985	0.897886	0.769462	0.956257	0.730155	0.99003	0.966986	0.894461
554	0.657945	0.919853	0.767624	0.926084	0.726502	0.974181	0.959345	0.905966
552	0.644056	0.950778	0.774073	0.947207	0.724361	0.974022	0.981284	0.906637
550	0.652066	0.935699	0.771435	0.920009	0.714282	0.97035	0.964291	0.874987
548	0.645293	0.904042	0.771008	0.935785	0.715835	0.986635	0.952421	0.909287
546	0.647203	0.93768	0.76922	0.927007	0.713541	1.00664	0.959087	0.904965
544	0.651176	0.924869	0.767121	0.921583	0.717599	0.995375	0.950507	0.926858
542	0.648931	0.935308	0.771521	0.905584	0.713598	0.968133	0.981438	0.889978
540	0.675774	0.93025	0.769331	0.926993	0.7098	1.00923	1.00273	0.912508
538	0.659862	0.921119	0.756481	0.970211	0.712284	1.02594	0.963055	0.901793
536	0.659852	0.917091	0.752967	0.948501	0.711102	1.01893	0.970213	0.895958
534	0.647165	0.931588	0.766435	0.937297	0.707934	0.934804	0.984204	0.901419
532	0.659967	0.936555	0.760576	0.939636	0.714635	1.007	0.982106	0.917693
530	0.658946	0.905984	0.757204	0.942352	0.708113	0.942353	0.968384	0.886191
528	0.655329	0.927917	0.76582	0.9234	0.712354	0.93553	0.95839	0.889223
526	0.649308	0.923863	0.750073	0.939423	0.712454	0.99606	1.00675	0.903663
524	0.660898	0.922484	0.746982	0.91349	0.718447	0.971474	0.976245	0.921113
522	0.654521	0.913183	0.756749	0.919559	0.719572	1.00411	0.930605	0.905555
520	0.669086	0.940773	0.75584	0.924977	0.725477	1.00102	0.973161	0.917461
518	0.642893	0.928482	0.755622	0.932106	0.726683	0.982546	0.991432	0.941833
516	0.65344	0.926783	0.761755	0.946667	0.731691	0.979729	0.962173	0.912622
514	0.672594	0.928366	0.762521	0.957042	0.734721	0.982965	0.993573	0.942418
512	0.668521	0.920702	0.764239	0.908947	0.737863	1.00078	0.980106	0.959903
510	0.659055	0.934155	0.772715	0.963026	0.739295	1.03578	1.02454	0.916082
508	0.666155	0.924663	0.767725	0.944	0.741009	1.00155	1.03385	0.94521
506	0.674308	0.931287	0.775283	0.945429	0.745767	1.02337	1.04535	0.937983
504	0.669259	0.947028	0.774182	0.947525	0.748514	1.0146	1.0206	0.962012
502	0.677073	0.959927	0.777554	0.957924	0.750281	0.993421	0.990832	0.937079
500	0.671101	0.955873	0.793061	0.967434	0.761124	0.985116	1.01338	0.944553

## Sheet: Figure_S2
Olive					Acacia					Eucalyptus
wavel	ext_cross_fresh	scat_cross_fresh	ext_cross_dark	scat_cross_dark	wavel	ext_cross_fresh	scat_cross_fresh	ext_cross_dark	scat_cross_dark	wavel	ext_cross_fresh	scat_cross_fresh	ext_cross_dark	scat_cross_dark
580	1.65e-13	1.63e-13	2.7e-13	2.61e-13	580	1.24e-13	1.23e-13	2.04e-13	1.85e-13	580	1.69e-13	1.05e-13	2.26e-13	1.68e-13
578	1.83e-13	1.64e-13	2.99e-13	2.63e-13	578	1.38e-13	1.23e-13	2.03e-13	1.86e-13	578	1.7e-13	1.06e-13	2.23e-13	1.69e-13
576	1.93e-13	1.65e-13	3.07e-13	2.64e-13	576	1.44e-13	1.24e-13	2.11e-13	1.87e-13	576	1.66e-13	1.07e-13	2.59e-13	1.7e-13
574	2.02e-13	1.66e-13	2.98e-13	2.65e-13	574	1.5e-13	1.25e-13	2.22e-13	1.88e-13	574	1.66e-13	1.07e-13	2.6e-13	1.71e-13
572	2.09e-13	1.67e-13	2.92e-13	2.66e-13	572	1.54e-13	1.26e-13	2.09e-13	1.9e-13	572	1.62e-13	1.08e-13	2.6e-13	1.72e-13
570	2.2e-13	1.68e-13	2.98e-13	2.68e-13	570	1.58e-13	1.27e-13	2.15e-13	1.91e-13	570	1.63e-13	1.09e-13	2.49e-13	1.73e-13
568	2.25e-13	1.68e-13	2.84e-13	2.69e-13	568	1.61e-13	1.27e-13	2.13e-13	1.92e-13	568	1.64e-13	1.1e-13	2.5e-13	1.74e-13
566	2.3e-13	1.69e-13	3.12e-13	2.71e-13	566	1.64e-13	1.28e-13	2.15e-13	1.93e-13	566	1.66e-13	1.1e-13	2.39e-13	1.75e-13
564	2.29e-13	1.7e-13	2.97e-13	2.72e-13	564	1.66e-13	1.29e-13	2.13e-13	1.94e-13	564	1.68e-13	1.11e-13	2.51e-13	1.77e-13
562	2.32e-13	1.71e-13	3.35e-13	2.73e-13	562	1.69e-13	1.3e-13	2.3e-13	1.95e-13	562	1.73e-13	1.12e-13	2.57e-13	1.78e-13
560	2.35e-13	1.72e-13	3.09e-13	2.75e-13	560	1.68e-13	1.31e-13	2.29e-13	1.97e-13	560	1.72e-13	1.13e-13	2.57e-13	1.79e-13
558	2.37e-13	1.73e-13	3.09e-13	2.76e-13	558	1.69e-13	1.32e-13	2.39e-13	1.98e-13	558	1.71e-13	1.13e-13	2.55e-13	1.8e-13
556	2.38e-13	1.74e-13	3.02e-13	2.78e-13	556	1.72e-13	1.32e-13	2.45e-13	1.99e-13	556	1.7e-13	1.14e-13	2.47e-13	1.81e-13
554	2.41e-13	1.75e-13	3.24e-13	2.79e-13	554	1.74e-13	1.33e-13	2.38e-13	2e-13	554	1.75e-13	1.15e-13	2.6e-13	1.82e-13
552	2.43e-13	1.76e-13	3.02e-13	2.8e-13	552	1.74e-13	1.34e-13	2.35e-13	2.01e-13	552	1.8e-13	1.16e-13	2.61e-13	1.83e-13
550	2.48e-13	1.77e-13	3.17e-13	2.81e-13	550	1.75e-13	1.35e-13	2.2e-13	2.02e-13	550	1.79e-13	1.17e-13	2.72e-13	1.84e-13
548	2.49e-13	1.78e-13	3.32e-13	2.82e-13	548	1.77e-13	1.36e-13	2.37e-13	2.03e-13	548	1.82e-13	1.18e-13	2.64e-13	1.85e-13
546	2.51e-13	1.79e-13	3.24e-13	2.83e-13	546	1.78e-13	1.37e-13	2.36e-13	2.04e-13	546	1.83e-13	1.19e-13	2.62e-13	1.86e-13
544	2.51e-13	1.8e-13	3.19e-13	2.84e-13	544	1.8e-13	1.38e-13	2.37e-13	2.05e-13	544	1.83e-13	1.19e-13	2.51e-13	1.87e-13
542	2.54e-13	1.81e-13	3.34e-13	2.86e-13	542	1.8e-13	1.39e-13	2.44e-13	2.06e-13	542	1.86e-13	1.2e-13	2.79e-13	1.88e-13
540	2.57e-13	1.82e-13	3.17e-13	2.87e-13	540	1.82e-13	1.4e-13	2.62e-13	2.07e-13	540	1.8e-13	1.21e-13	2.76e-13	1.89e-13
538	2.57e-13	1.83e-13	3.23e-13	2.88e-13	538	1.87e-13	1.41e-13	2.55e-13	2.08e-13	538	1.85e-13	1.22e-13	2.71e-13	1.9e-13
536	2.59e-13	1.84e-13	3.45e-13	2.89e-13	536	1.89e-13	1.42e-13	2.55e-13	2.09e-13	536	1.87e-13	1.23e-13	2.81e-13	1.91e-13
534	2.62e-13	1.85e-13	3.21e-13	2.9e-13	534	1.87e-13	1.43e-13	2.55e-13	2.1e-13	534	1.92e-13	1.24e-13	2.65e-13	1.93e-13
532	2.61e-13	1.87e-13	3.33e-13	2.91e-13	532	1.9e-13	1.44e-13	2.43e-13	2.11e-13	532	1.89e-13	1.25e-13	2.65e-13	1.94e-13
530	2.65e-13	1.88e-13	3.49e-13	2.93e-13	530	1.92e-13	1.46e-13	2.71e-13	2.12e-13	530	1.91e-13	1.26e-13	2.75e-13	1.95e-13
528	2.65e-13	1.89e-13	3.37e-13	2.94e-13	528	1.91e-13	1.47e-13	2.56e-13	2.13e-13	528	1.94e-13	1.27e-13	2.92e-13	1.96e-13
526	2.67e-13	1.9e-13	3.35e-13	2.95e-13	526	1.97e-13	1.48e-13	2.65e-13	2.14e-13	526	1.97e-13	1.28e-13	2.77e-13	1.97e-13
524	2.66e-13	1.91e-13	3.46e-13	2.96e-13	524	1.99e-13	1.49e-13	2.78e-13	2.15e-13	524	1.95e-13	1.29e-13	2.84e-13	1.98e-13
522	2.67e-13	1.92e-13	3.38e-13	2.97e-13	522	1.98e-13	1.5e-13	2.61e-13	2.16e-13	522	1.99e-13	1.3e-13	2.82e-13	1.99e-13
520	2.67e-13	1.93e-13	3.59e-13	2.99e-13	520	2e-13	1.51e-13	2.49e-13	2.18e-13	520	1.96e-13	1.31e-13	2.82e-13	2.01e-13
518	2.68e-13	1.95e-13	3.56e-13	3e-13	518	2.02e-13	1.52e-13	2.83e-13	2.19e-13	518	2.06e-13	1.32e-13	2.9e-13	2.02e-13
516	2.68e-13	1.96e-13	3.43e-13	3.01e-13	516	2.01e-13	1.53e-13	2.68e-13	2.2e-13	516	2.04e-13	1.33e-13	2.86e-13	2.03e-13
514	2.68e-13	1.97e-13	3.37e-13	3.03e-13	514	2.03e-13	1.55e-13	2.68e-13	2.21e-13	514	2e-13	1.34e-13	2.72e-13	2.04e-13
512	2.69e-13	1.98e-13	3.49e-13	3.04e-13	512	2.04e-13	1.56e-13	2.77e-13	2.22e-13	512	2.02e-13	1.35e-13	2.88e-13	2.05e-13
510	2.7e-13	2e-13	3.45e-13	3.05e-13	510	2.03e-13	1.57e-13	2.68e-13	2.23e-13	510	2.07e-13	1.36e-13	2.91e-13	2.07e-13
508	2.71e-13	2.01e-13	3.43e-13	3.06e-13	508	2.06e-13	1.58e-13	2.69e-13	2.24e-13	508	2.06e-13	1.37e-13	2.95e-13	2.08e-13
506	2.71e-13	2.02e-13	3.3e-13	3.08e-13	506	2.06e-13	1.6e-13	2.62e-13	2.26e-13	506	2.06e-13	1.39e-13	2.76e-13	2.09e-13
504	2.72e-13	2.03e-13	3.37e-13	3.09e-13	504	2.08e-13	1.61e-13	2.57e-13	2.27e-13	504	2.09e-13	1.4e-13	3.06e-13	2.11e-13
502	2.73e-13	2.05e-13	3.29e-13	3.1e-13	502	2.08e-13	1.62e-13	2.61e-13	2.28e-13	502	2.08e-13	1.41e-13	3.12e-13	2.12e-13
500	2.71e-13	2.06e-13	3.48e-13	3.12e-13	500	2.06e-13	1.63e-13	2.7e-13	2.29e-13	500	2.12e-13	1.42e-13	3.11e-13	2.13e-13

## Sheet: Figure_S3
Olive				Acacia				Eucalyptus
wavel	ext_cross_fresh	scat_cross_fresh	ext_cross_dark	wavel	ext_cross_fresh	scat_cross_fresh	ext_cross_dark	wavel	ext_cross_fresh	scat_cross_fresh	ext_cross_dark
580	1.87e-13	4.75e-14	1.96e-13	580	6.29e-14	2.13e-14	-3.85e-15	580	2.24e-13	9.41e-14	1.37e-13
578	1.92e-13	4.78e-14	2.09e-13	578	6.16e-14	2.14e-14	2.77e-14	578	2.1e-13	9.46e-14	1.35e-13
576	1.84e-13	4.81e-14	1.92e-13	576	7.19e-14	2.15e-14	4.04e-14	576	2.16e-13	9.5e-14	2.02e-13
574	1.77e-13	4.84e-14	1.9e-13	574	7.18e-14	2.17e-14	3.12e-14	574	2.18e-13	9.55e-14	1.65e-13
572	1.85e-13	4.86e-14	2.06e-13	572	7.64e-14	2.18e-14	5.15e-14	572	2.19e-13	9.6e-14	1.85e-13
570	1.79e-13	4.89e-14	2.17e-13	570	7.33e-14	2.2e-14	4.75e-14	570	2.15e-13	9.65e-14	1.83e-13
568	1.87e-13	4.92e-14	1.9e-13	568	7.28e-14	2.22e-14	6.31e-14	568	2.28e-13	9.7e-14	1.83e-13
566	1.74e-13	4.95e-14	2.21e-13	566	6.9e-14	2.23e-14	6.77e-14	566	2.14e-13	9.75e-14	1.81e-13
564	1.8e-13	4.97e-14	2.09e-13	564	7.01e-14	2.25e-14	8.02e-14	564	2.24e-13	9.8e-14	2e-13
562	1.85e-13	5e-14	2.28e-13	562	7.17e-14	2.26e-14	4.33e-14	562	2.24e-13	9.85e-14	2.22e-13
560	1.92e-13	5.03e-14	2.33e-13	560	7.63e-14	2.28e-14	5.68e-14	560	2.33e-13	9.9e-14	2e-13
558	1.81e-13	5.06e-14	2.16e-13	558	7.57e-14	2.29e-14	7.24e-14	558	2.32e-13	9.96e-14	2.33e-13
556	1.85e-13	5.09e-14	2.14e-13	556	7.64e-14	2.31e-14	5.82e-14	556	2.39e-13	1e-13	2.36e-13
554	1.81e-13	5.12e-14	2.19e-13	554	8.11e-14	2.33e-14	6.34e-14	554	2.27e-13	1.01e-13	2.25e-13
552	1.83e-13	5.15e-14	2.43e-13	552	8.04e-14	2.34e-14	7.8e-14	552	2.3e-13	1.01e-13	1.88e-13
550	1.87e-13	5.17e-14	2.33e-13	550	8.19e-14	2.35e-14	8.27e-14	550	2.3e-13	1.01e-13	2.1e-13
548	1.85e-13	5.2e-14	2.15e-13	548	8.06e-14	2.36e-14	5.23e-14	548	2.41e-13	1.02e-13	1.8e-13
546	1.78e-13	5.22e-14	2.14e-13	546	8.2e-14	2.37e-14	5.13e-14	546	2.26e-13	1.02e-13	2.27e-13
544	1.89e-13	5.25e-14	2.48e-13	544	8.31e-14	2.38e-14	6.59e-14	544	2.33e-13	1.02e-13	1.83e-13
542	1.86e-13	5.28e-14	2.3e-13	542	7.99e-14	2.4e-14	5.89e-14	542	2.3e-13	1.03e-13	1.92e-13
540	1.77e-13	5.3e-14	2.12e-13	540	8.15e-14	2.41e-14	6.35e-14	540	2.37e-13	1.03e-13	1.66e-13
538	1.88e-13	5.33e-14	2.26e-13	538	7.84e-14	2.42e-14	5.91e-14	538	2.44e-13	1.03e-13	2.21e-13
536	1.91e-13	5.36e-14	2.25e-13	536	8.22e-14	2.43e-14	7.08e-14	536	2.42e-13	1.04e-13	2.56e-13
534	1.88e-13	5.39e-14	2.21e-13	534	8.39e-14	2.44e-14	6.68e-14	534	2.5e-13	1.04e-13	1.92e-13
532	1.96e-13	5.41e-14	2.02e-13	532	8.01e-14	2.46e-14	7.32e-14	532	2.33e-13	1.04e-13	1.95e-13
530	1.9e-13	5.44e-14	2.16e-13	530	8.01e-14	2.47e-14	8.26e-14	530	2.41e-13	1.05e-13	1.72e-13
528	1.9e-13	5.47e-14	2.27e-13	528	7.83e-14	2.48e-14	7.91e-14	528	2.33e-13	1.05e-13	2.32e-13
526	1.79e-13	5.5e-14	2.25e-13	526	7.7e-14	2.49e-14	7.07e-14	526	2.48e-13	1.05e-13	1.89e-13
524	1.87e-13	5.53e-14	2.21e-13	524	8.26e-14	2.51e-14	7.94e-14	524	2.47e-13	1.06e-13	2.21e-13
522	1.91e-13	5.56e-14	2.13e-13	522	8.4e-14	2.52e-14	6.09e-14	522	2.4e-13	1.06e-13	1.75e-13
520	1.93e-13	5.59e-14	2.34e-13	520	8.57e-14	2.53e-14	7.35e-14	520	2.41e-13	1.07e-13	2.09e-13
518	1.92e-13	5.62e-14	2.31e-13	518	7.92e-14	2.54e-14	6.6e-14	518	2.49e-13	1.07e-13	1.91e-13
516	1.9e-13	5.65e-14	2.16e-13	516	7.9e-14	2.56e-14	8.94e-14	516	2.39e-13	1.07e-13	2.15e-13
514	1.94e-13	5.68e-14	2.41e-13	514	8.34e-14	2.57e-14	7.75e-14	514	2.46e-13	1.08e-13	1.78e-13
512	1.93e-13	5.71e-14	2.19e-13	512	8.17e-14	2.58e-14	7.88e-14	512	2.51e-13	1.08e-13	2.1e-13
510	1.95e-13	5.74e-14	2.26e-13	510	8.26e-14	2.6e-14	6.28e-14	510	2.52e-13	1.08e-13	2.5e-13
508	2e-13	5.77e-14	2.38e-13	508	8.3e-14	2.61e-14	8.57e-14	508	2.54e-13	1.09e-13	2.16e-13
506	1.99e-13	5.8e-14	2.29e-13	506	7.9e-14	2.63e-14	7.78e-14	506	2.47e-13	1.09e-13	2.12e-13
504	1.94e-13	5.83e-14	2.23e-13	504	7.99e-14	2.64e-14	1.03e-13	504	2.4e-13	1.1e-13	2.22e-13
502	1.89e-13	5.86e-14	2.35e-13	502	8.2e-14	2.65e-14	7.78e-14	502	2.37e-13	1.1e-13	2.04e-13
500	1.89e-13	5.9e-14	2.39e-13	500	8.08e-14	2.67e-14	1.05e-13	500	2.37e-13	1.1e-13	2.07e-13

## Sheet: Figure_S4
Time_elapsed_Aca_500_voc	OA_enhancement_Aca_500_voc	Time_elapsed_Aca_500_light	OA_enhancement_Aca_500_light	Time_elapsed_Euca_500_voc	OA_enhancement_Euca_500_Voc	Time_elapsed_olive_500_light	OA_enhancement_olive_500_light
-0.333611	1.02062	-0.25	1.00022	-0.666389	0.978181	-0.333333	1.06274
-0.25	1.01016	-0.166667	0.998364	-0.583333	1.00214	-0.249722	1.1423
-0.166944	0.995594	-0.0833333	0.989105	-0.5	0.995352	-0.166667	1.1927
-0.0836111	0.980716	0	1.03769	-0.416389	0.996874	-0.0833333	1.13646
0	1.02813	0.0833333	1.05626	-0.333333	1.01102	0	1.04422
0.0830556	1.03043	0.166667	1.05725	-0.25	0.957459	0.0836111	0.995509
0.166389	1.00893	0.25	1.07449	-0.166389	0.917729	0.166667	1.01172
0.25	0.993375	0.333611	1.13501	-0.0833333	0.948949	0.25	0.973077
0.333056	1.05437	0.416667	1.17196	0	0.998168	0.333333	0.997645
0.416389	1.07346	0.5	1.18154	0.0833333	1.03006	0.416667	1.01362
0.5	1.10546	0.583611	1.21047	0.166667	1.06069	0.500278	1.02499
0.583056	1.15709	0.666667	1.20114	0.250278	1.108	0.583333	1.01612
0.666389	1.2082	0.75	1.20597	0.333333	1.11683	0.666667	1.02573
0.749722	1.21255	0.833611	1.22159	0.416667	1.11021	0.750278	1.05794
0.833056	1.24182	0.916667	1.2327	0.5	1.13542	0.833333	1.07004
0.916667	1.25556	1	1.24251	0.583333	1.18391	0.916667	1.08308
0.999722	1.2684	1.08361	1.25004	0.666944	1.18098	1.00028	1.07443
1.08306	1.27175	1.16667	1.25725	0.75	1.2302	1.08333	1.09585
1.16639	1.28342	1.25	1.27924	0.833333	1.23926	1.16667	1.05988
1.24972	1.28345	1.33361	1.26402	0.916667	1.22607	1.25	1.08113
1.33333	1.27882	1.41667	1.25596	1	1.20975	1.33333	1.08713
1.41639	1.28524	1.5	1.26553	1.08361	1.22549	1.41694	1.09181
1.49972	1.26098	1.58361	1.26699	1.16667	1.25692	1.5	1.09097
1.58306	1.25623	1.66667	1.28861	1.25	1.2265	1.58333	1.06191
1.66639	1.26088	1.75	1.26735	1.33361	1.22759	1.66694	1.08134
1.75	1.29603	1.83333	1.27609	1.41667	1.25776	1.75	1.09729
1.83306	1.30782	1.91667	1.25467	1.5	1.27006	1.83333	1.1082
1.91639	1.29147	2.00028	1.27515	1.58361	1.26043	1.91667	1.12244
1.99972	1.29705	2.08333	1.26108	1.66667	1.23479	2	1.103
2.08306	1.31081	2.16667	1.26496	1.75	1.24641	2.08333	1.10255
2.16667	1.27963	2.25028	1.29023	1.83333	1.23509	2.16667	1.10815
2.24972	1.28878	2.33333	1.27083	1.91667	1.22297	2.25	1.19496
2.33306	1.2697	2.41667	1.3145	2.00028	1.24078	2.33333	1.16226
2.41639	1.29154	2.5	1.29502	2.08333	1.21035	2.41667	1.15865
2.49972	1.28901	2.58333	1.29843	2.16667	1.18207	2.5	1.1708
2.58333	1.26693	2.66694	1.32424	2.25	1.18696	2.58333	1.143
2.66639	1.28555	2.75	1.32439	2.33333	1.17277	2.66667	1.15963
2.75	1.26982	2.83333	1.28531	2.41694	1.2065	2.75	1.16649
2.83306	1.28947	2.91667	1.31779	2.5	1.22131	2.83333	1.14397
2.91639	1.29507	3	1.30042	2.58333	1.19487	2.91667	1.14204
2.99972	1.25981	3.08361	1.30851	2.66667	1.19699	3	1.1558
3.08306	1.25616	3.16667	1.31906	2.75	1.19129	3.08333	1.15558
3.16667	1.26277	3.25	1.31998	2.83361	1.22172	3.16667	1.18661
3.24972	1.2675	3.33333	1.32388	2.91667	1.20203	3.25	1.18215
3.33333	1.25738	3.41667	1.33935	3	1.21303	3.33333	1.16939
3.41639	1.27683	3.5	1.33077	3.08361	1.19661	3.41667	1.13405
3.49972	1.23226	3.58333	1.311	3.16667	1.20458	3.5	1.16552
3.58333	1.22934	3.66694	1.27237	3.25	1.20453	3.58333	1.13642
3.66639	1.23111	3.75	1.27014	3.33333	1.24737	3.66667	1.15399
3.75	1.22345	3.83333	1.30507	3.41667	1.22206	3.75	1.13363
3.83306	1.22928	3.91667	1.29919	3.50028	1.20775	3.83333	1.14759
3.91639	1.23038	4	1.30222	3.58333	1.21924	3.91667	1.1693
3.99972	1.24094	4.08361	1.33684	3.66667	1.21415	4	1.17827
4.08306	1.22467	4.16667	1.35725	3.75	1.19773	4.08333	1.11494
4.16667	1.23174	4.25	1.31109	3.83333	1.19672	4.16667	1.13083
4.24972	1.21753	4.33361	1.32381	3.91667	1.20155	4.25	1.1325
4.33333	1.25037	4.41667	1.33205	4	1.18016	4.33333	1.1785
4.41639	1.24574	4.5	1.35099	4.08361	1.19593	4.41667	1.17203
4.5	1.27163	4.58361	1.32455	4.16667	1.17493	4.5	1.19127
4.58306	1.26501	4.66667	1.32322	4.25	1.20236	4.58333	1.19757
4.66639	1.27141	4.75	1.33374	4.33361	1.21054	4.66667	1.1853
4.74972	1.23509	4.83333	1.3291	4.41667	1.24299	4.75	1.18162
4.83306	1.19929	4.91667	1.33905	4.5	1.22121	4.83333	1.1335
4.91639	1.23404	5	1.37025	4.58333	1.20924	4.91667	1.1468
4.99972	1.23686	5.08333	1.34659	4.66667	1.24423	5	1.17938
5.08306	1.23504	5.16694	1.32647	4.75	1.22504	5.08333	1.18106
5.16639	1.23084	5.25	1.34883	4.83333	1.23025	5.16667	1.20803
5.24972	1.24015	5.33333	1.32144	4.91694	1.20075	5.25	1.19484
5.33306	1.26957	5.41667	1.34651	5	1.21585	5.33333	1.18779
5.41639	1.26128	5.5	1.36424	5.08333	1.22049	5.41667	1.16828
5.5	1.27503	5.58333	1.33457	5.16667	1.20509	5.5	1.14429
5.58306	1.2979	5.66667	1.40853	5.25	1.20088	5.58333	1.15731
5.66639	1.28723	5.75028	1.35569	5.33361	1.23309	5.66667	1.1693
5.74972	1.29591	5.83333	1.44215	5.41667	1.25251	5.75	1.14095
5.83306	1.29368	5.91694	1.38284	5.5	1.27719	5.83333	1.18979
5.91667	1.33292	6	1.38878	5.58333	1.24498	5.91667	1.15211
5.99972	1.31639	6.08333	1.41119	5.66667	1.25782	6	1.15433
6.08306	1.31155	6.16694	1.41565	5.75028	1.25434	6.08333	1.20243
6.16639	1.30092	6.25	1.39099	5.83333	1.21908	6.16667	1.16168
6.24972	1.27152	6.33333	1.40083	5.91667	1.2197	6.25	1.15432
6.33333	1.26066	6.41694	1.40602	6	1.21235	6.33333	1.16388
6.41639	1.28305	6.5	1.44391	6.08333	1.24113	6.41667	1.18586
6.49972	1.36427	6.58333	1.45577	6.16694	1.23086	6.5	1.15541
6.58306	1.33209	6.66694	1.41253	6.25	1.23252	6.58333	1.18978
6.66639	1.32119	6.75	1.39714	6.33361	1.26434	6.66694	1.22172
6.75	1.29969	6.83361	1.41664	6.41667	1.27042	6.75	1.20021
6.83306	1.31701	6.91667	1.36912	6.5	1.27443	6.83333	1.19192
6.91667	1.30109	7	1.36647	6.58361	1.27583	6.91667	1.22244
6.99972	1.28645	7.08361	1.39222	6.66667	1.2082	7	1.24506
7.08306	1.26536	7.16667	1.41025	6.75028	1.27316	7.08361	1.2097
7.16667	1.2854	7.25028	1.401	6.83333	1.30905	7.16667	1.20673
7.24972	1.33674	7.33333	1.43671	6.91667	1.29521	7.25	1.19605
7.33306	1.35086	7.41667	1.37345	7.00028	1.36727	7.33333	1.20609
7.41667	1.33209	7.50028	1.37438	7.08333	1.35009	7.41667	1.17996
7.49972	1.38366	7.58333	1.37706	7.16694	1.37138	7.5	1.15806
7.58333	1.36283	7.66694	1.42285	7.25	1.33587	7.58333	1.19833
7.66639	1.36867	7.75	1.43945	7.33333	1.33439	7.66667	1.22148
7.74972	1.35903	7.83333	1.40765	7.41667	1.39119	7.75	1.22921
7.83306	1.32487	7.91667	1.41256	7.5	1.31711	7.83361	1.24806
7.91639	1.32638	8	1.40854	7.58333	1.29326	7.91667	1.25722
8	1.38935	8.08333	1.40247	7.66667	1.29847	8	1.25682
8.08306	1.34334	8.16667	1.44076	7.75028	1.30571	8.08361	1.24141
8.16639	1.36006	8.25	1.44682	7.83333	1.27495	8.16667	1.25558
8.25	1.35936	8.33361	1.48741	7.91667	1.36596	8.25	1.24314
8.33306	1.36868	8.41667	1.47102	8.00028	1.32931	8.33333	1.24084
8.41639	1.3474	8.5	1.47829	8.08333	1.27758	8.41667	1.24994
8.49972	1.37496	8.58333	1.50323	8.16694	1.25226	8.5	1.28059
8.58306	1.33748	8.66667	1.42115	8.25	1.24253	8.58333	1.25966
8.66639	1.31739	8.75028	1.43617	8.33361	1.20203	8.66694	1.25196
8.74972	1.35774	8.83333	1.4668	8.41667	1.22035	8.75	1.23059
8.83306	1.35018	8.91667	1.42282	8.5	1.27697	8.83333	1.19245
8.91639	1.30087	9.00028	1.44178	8.58361	1.27028	8.91694	1.22985
8.99972	1.33998	9.08333	1.45307	8.66667	1.27906	9	1.25823
9.08333	1.36674	9.16694	1.45683	8.75	1.28668	9.08361	1.28007
9.16639	1.40397	9.25	1.45093	8.83361	1.35577	9.16667	1.29992
9.24972	1.36641	9.33333	1.44848	8.91667	1.32448	9.25	1.33126
9.33333	1.38394	9.41667	1.46776	9	1.31386	9.33361	1.28205
9.41639	1.40194	9.5	1.42077	9.08333	1.38818	9.41667	1.3341
9.5	1.38961	9.58361	1.41634	9.16667	1.35812	9.5	1.35458
9.58306	1.37381	9.66667	1.44592	9.25028	1.35128	9.58361	1.33493
9.66639	1.39249	9.75	1.46003	9.33333	1.35617	9.66667	1.31985
9.74972	1.38914	9.83333	1.47908	9.41667	1.33276	9.75	1.33477
9.83306	1.39205	9.91667	1.46249	9.5	1.39663	9.83333	1.29005
9.91639	1.40169	10.0003	1.44289	9.58333	1.33299	9.91667	1.28839
9.99972	1.40161	10.0833	1.48233	9.66694	1.31269	10.0003	1.26936
10.0831	1.42165	10.1667	1.46604	9.75	1.33661	10.0833	1.30166
10.1664	1.37899	10.2503	1.39563	9.83333	1.31377	10.1667	1.3209
10.25	1.3738	10.3333	1.43126	9.91694	1.34331	10.25	1.23695
10.3331	1.38143	10.4167	1.41485	10	1.33366	10.3333	1.37142
10.4164	1.35521	10.5003	1.4131	10.0836	1.36955	10.4167	1.3697
10.5	1.34396	10.5833	1.44879	10.1667	1.33017	10.5003	1.31762
10.5831	1.361	10.6669	1.46531	10.25	1.35917	10.5833	1.33981
10.6664	1.367	10.75	1.4543	10.3336	1.3926	10.6667	1.32041
10.7497	1.34052	10.8333	1.50997	10.4167	1.46057	10.75	1.30004
10.8331	1.35741	10.9169	1.47962	10.5003	1.31163	10.8333	1.30967
10.9167	1.351	11	1.41012	10.5833	1.34571	10.9169	1.32945
10.9997	1.42503	11.0833	1.41303	10.6667	1.27178	11	1.29115
11.0831	1.43071	11.1667	1.424	10.7503	1.29553	11.0833	1.29656
11.1664	1.40402	11.25	1.47595	10.8333	1.31675	11.1667	1.31629
11.2497	1.39973	11.3333	1.50064	10.9167	1.29022	11.25	1.3088
11.3333	1.44373	11.4167	1.43609	11.0003	1.26149	11.3333	1.30293
11.4164	1.4022	11.5003	1.46433	11.0833	1.36307	11.4169	1.31172
11.4997	1.4022	11.5833	1.46884	11.1667	1.35337	11.5	1.30885
11.5831	1.41692	11.6667	1.48665	11.2503	1.36834	11.5833	1.35029
11.6664	1.40735	11.75	1.48859	11.3333	1.34223	11.6669	1.36033
11.7497	1.43007	11.8333	1.50846	11.4169	1.33354
11.8331	1.4782	11.9167	1.50669	11.5	1.38819
11.9164	1.46836	12.0003		11.5833	1.35221
				11.6669	1.34828
				11.75	1.259
				11.8333	1.27215
				11.9169	1.29016
				12	1.296

## Sheet: Figure_S5
Time_elapsed_SMPS	OA_enhancement_SMPS	Time_elapsed_ACSM	OA_enhancement_ACSM
-1.21583	1.00479	-1.21444	0.974241
-1.16611	1.01617	-1.17972	0.990794
-1.11611	1.00053	-1.145	0.995812
-1.06583	0.995859	-1.11028	0.996873
-1.01611	0.996634	-1.07556	0.983453
-0.966107	0.998178	-1.04083	1.00318
-0.916107	1.00283	-1.00611	0.995123
-0.100273	0.996369	-0.971389	1.00011
-0.0502733	1.01417	-0.936667	0.994112
4.44e-06	0.987634	-0.902222	1.00982
0.0497267	1.01021	-0.8675	1.01331
0.0997267	1.02366	-0.832778	1.00878
0.149727	1.04479	-0.798056	1.00396
0.199727	1.06174	-0.763333	0.997778
0.249727	1.07051	-0.728611	1.01095
0.299727	1.06847	-0.693889	1.0148
0.349727	1.06565	-0.659167	1.00636
0.399727	1.08342	-0.624444	0.996429
0.450004	1.07792	-0.589722	1.00027
0.500004	1.07091	-0.555	0.990799
0.549727	1.07235	-0.520278	0.984619
0.600004	1.07528	-0.485556	0.996974
0.649727	1.09041	-0.450833	0.991925
0.699727	1.12454	-0.416111	0.991045
0.750004	1.11387	-0.381389	0.995077
0.799727	1.13031	-0.346667	0.989587
0.849727	1.13646	-0.312222	0.999394
0.899727	1.13457	-0.2775	0.998643
0.950004		-0.242778	1.01993
1.17612	1.16845	-0.208056	1.00602
1.21473	1.20187	-0.173333	0.982366
1.25306	1.20692	-0.138611	1.00935
1.29167	1.19254	-0.103889	1.02034
1.33028	1.195	-0.0691667	0.999385
1.36889	1.21506	-0.0344444	1.01294
1.4075	1.21023	0	0.975793
1.44612	1.22172	0.0347222	0.992787
1.48473	1.23023	0.0694444	1.03196
1.52334	1.21827	0.104167	1.06239
1.56223	1.21078	0.138889	1.08653
1.60084	1.21335	0.173611	1.10424
1.63945	1.21936	0.208333	1.12021
1.67806	1.21026	0.243056	1.1524
1.71667	1.21447	0.277778	1.13635
2.32528		0.3125	1.14428
2.37528		0.347222	1.15517
2.42528		0.381944	1.15266
2.47556		0.416667	1.16378
2.52556		0.451389	1.19055
2.57528		0.486111	1.19105
2.62556		0.520833	1.19328
2.67528		0.555556	1.19239
2.72528		0.59	1.19411
		0.625	1.20907
		0.659444	1.21471
		0.694167	1.2135
		0.728889	1.22294
		0.763611	1.23643
		0.798333	1.22612
		0.833056	1.24142
		0.867778	1.22928
		0.9025	1.25317
		0.937222	1.24024
		0.971944	1.24026
		1.00667	1.23751
		1.04111	1.24069
		1.07583	1.24796
		1.11056	1.25184
		1.14528	1.25329
		1.18	1.24966
		1.21472	1.25571
		1.24944	1.26286
		1.28389	1.25638
		1.31861	1.25297
		1.35333	1.26367
		1.38806	1.25483
		1.42278	1.26145
		1.4575	1.25158
		1.49222	1.24347
		1.52694	1.2651
		1.56167	1.26536
		1.59639	1.25041
		1.63083	1.25634
		1.66556	1.2659
		1.70028	1.25956
		1.735	1.2571
		1.76972	1.2617
		1.80444	1.25422
		1.83917	1.26234
		1.87361	1.27232
		1.90833	1.24597
		1.94306	1.27166
		1.97778	1.26624
		2.0125	1.26689
		2.04722	1.26671
		2.08194	1.26504
		2.11667	1.27343
		2.15139	1.26238
		2.18583	1.27543
		2.22056	1.27318
		2.25528	1.25734
		2.29	1.2663
		2.32472	1.25936
		2.35944	1.26771
		2.39417	1.26416
		2.42889	1.27419
		2.46361	1.28194
		2.49833	1.26538
		2.53278	1.26523
		2.56778	1.27162
		2.60222	1.27408
		2.63694	1.26548
		2.67167	1.26366
		2.70639	1.27254
		2.74111	1.267
		2.77583	1.25995
		2.81028	1.27037
		2.845	1.2716
		2.87972	1.26201
		2.91444	1.26268
		2.94917	1.26215
		2.98389	1.27854
		3.01861	1.28256
		3.05333	1.2645
		3.08806	1.2801
		3.12278	1.289
		3.1575	1.27181
		3.19194	1.27325
		3.22667	1.25687
		3.26139	1.27814
		3.29611	1.25771
		3.33083	1.27362
		3.36556	1.27129
		3.40028	1.27786
		3.43472	1.27606
		3.46944	1.25823
		3.50417	1.27884
		3.53889	1.26959
		3.57361	1.27935
		3.60833	1.26906
		3.64306	1.27786
		3.67778	1.27191
		3.71222	1.26158
		3.74694	1.27494
		3.78167	1.26957
		3.81639	1.27893
		3.85111	1.25935
		3.88583	1.26929
		3.92056	1.26603
		3.95528	1.28508
		3.99	1.27243
		4.02472	1.27949
		4.05944	1.27405
		4.09417	1.27125
		4.12889	1.26504
		4.16361	1.27459
		4.19833	1.28203
		4.23278	1.27842
		4.2675	1.27601
		4.30222	1.27875
		4.33694	1.27323
		4.37167	1.28449
		4.40639	1.2644
		4.44111	1.28696
		4.47583	1.28275
		4.51056	1.27911
		4.54528	1.26143
		4.58	1.266
		4.61472	1.36554
		4.64944	1.28552
		4.68417	1.22876
		4.71889	1.25411
		4.75361	1.24096
		4.78833	1.24954
		4.82306	1.25118
		4.85778	1.23446
		4.8925	1.25416
		4.92722	1.22599
		4.96194	1.25217
		4.99667	1.24938
		5.03139	1.24024
		5.06611	1.23341
